# Supplementary material
Source: PubMed Central journal article supplement (PMC4123739)
Supplement: NIHMS576040-supplement-Supp_figureS1-S5.pdf [file NIHMS576040-supplement-Supp_figureS1-S5.pdf]

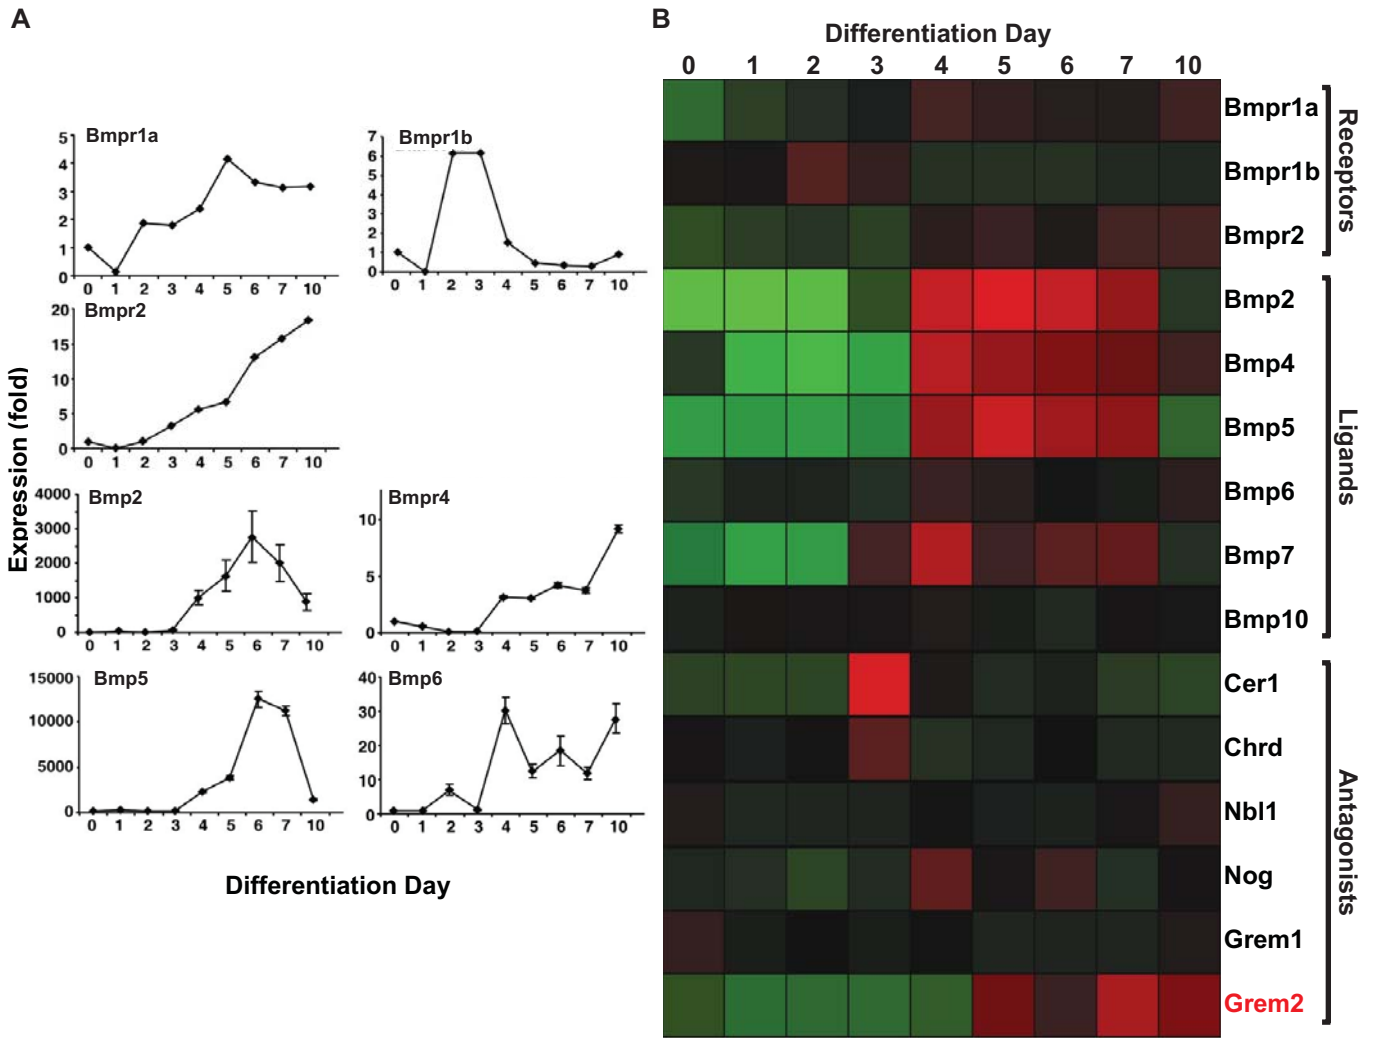

Fig. S1 Hatzopoulos

Top

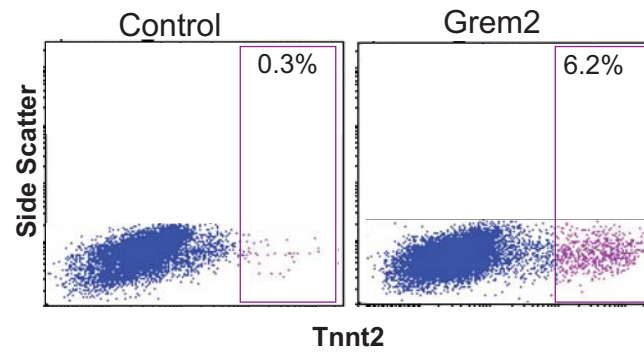

Fig. S2 Hatzopoulos

Top

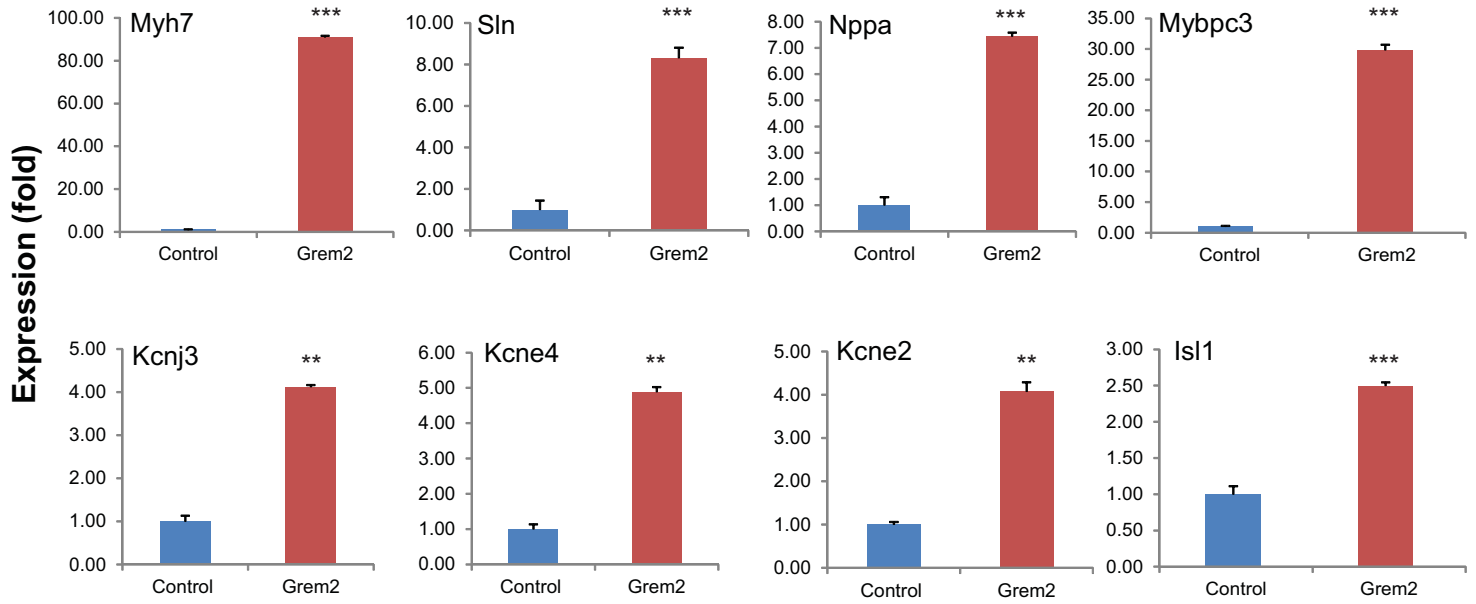

Fig. S3 Hatzopoulos

Top

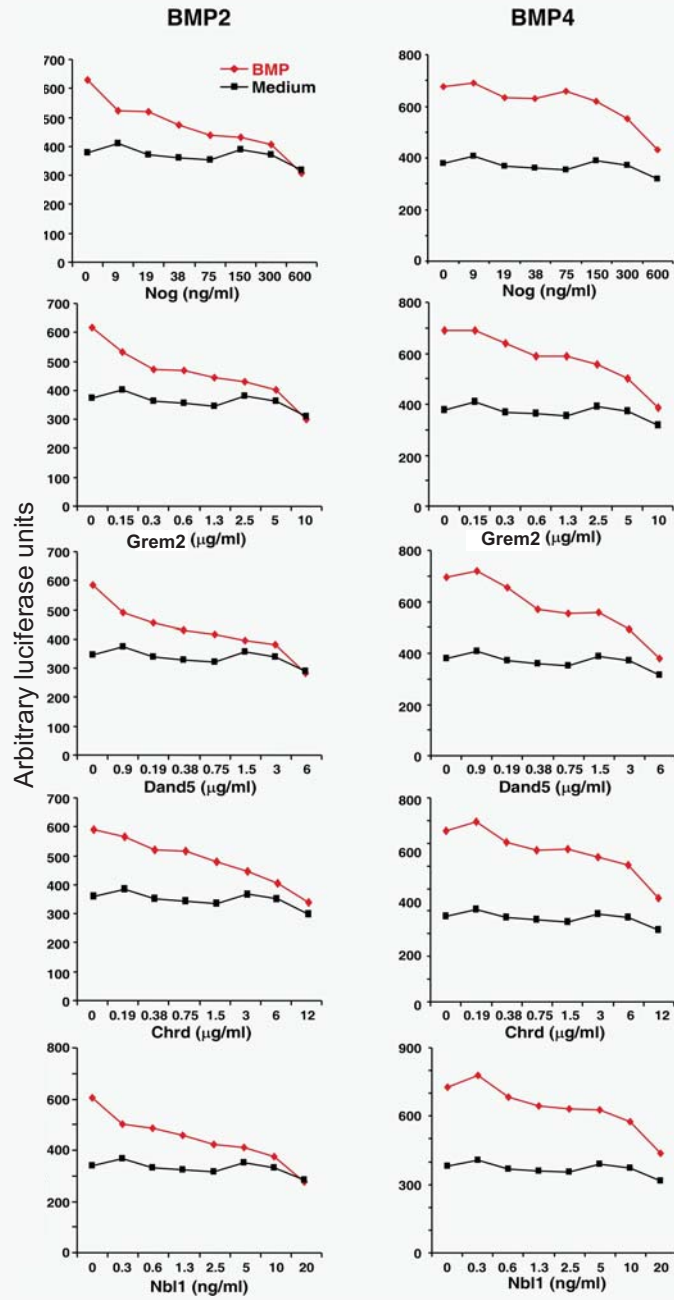

Fig. S4 Hatzopoulos

Top

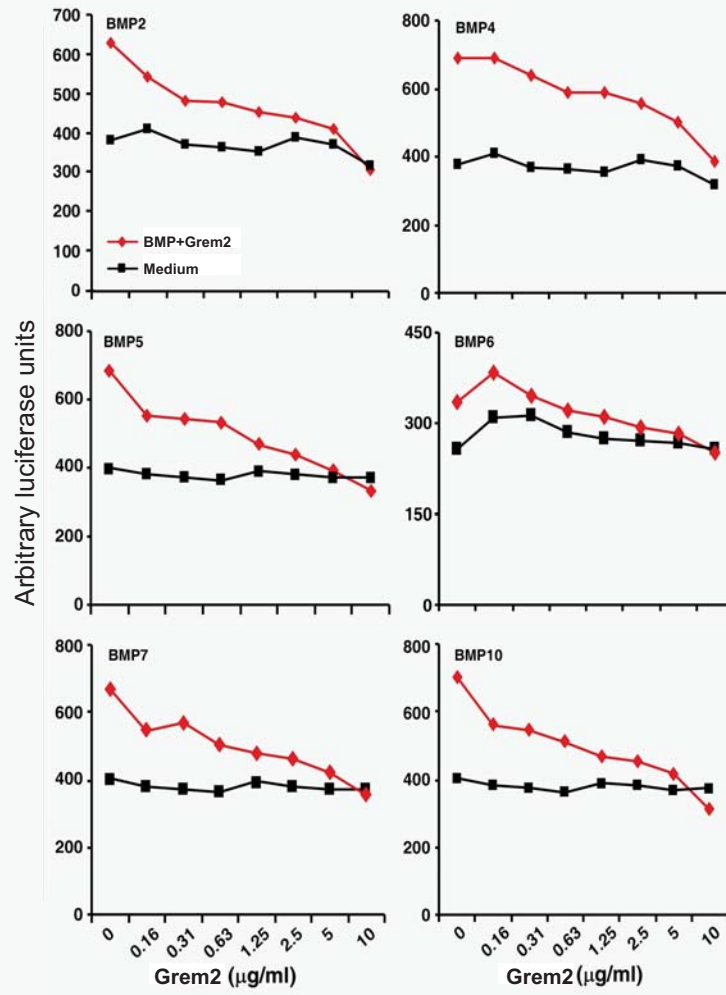

Fig. S5 Hatzopoulos
